# Supplementary material for: Genital Tract Sequestration of SIV following Acute Infection
Source: PubMed Central journal article supplement (PMC3040679; doi:10.1371/journal.ppat.1001293), 2011-02-17
Supplement: ppat.1001293.s002.pdf [file ppat.1001293.s002.pdf]

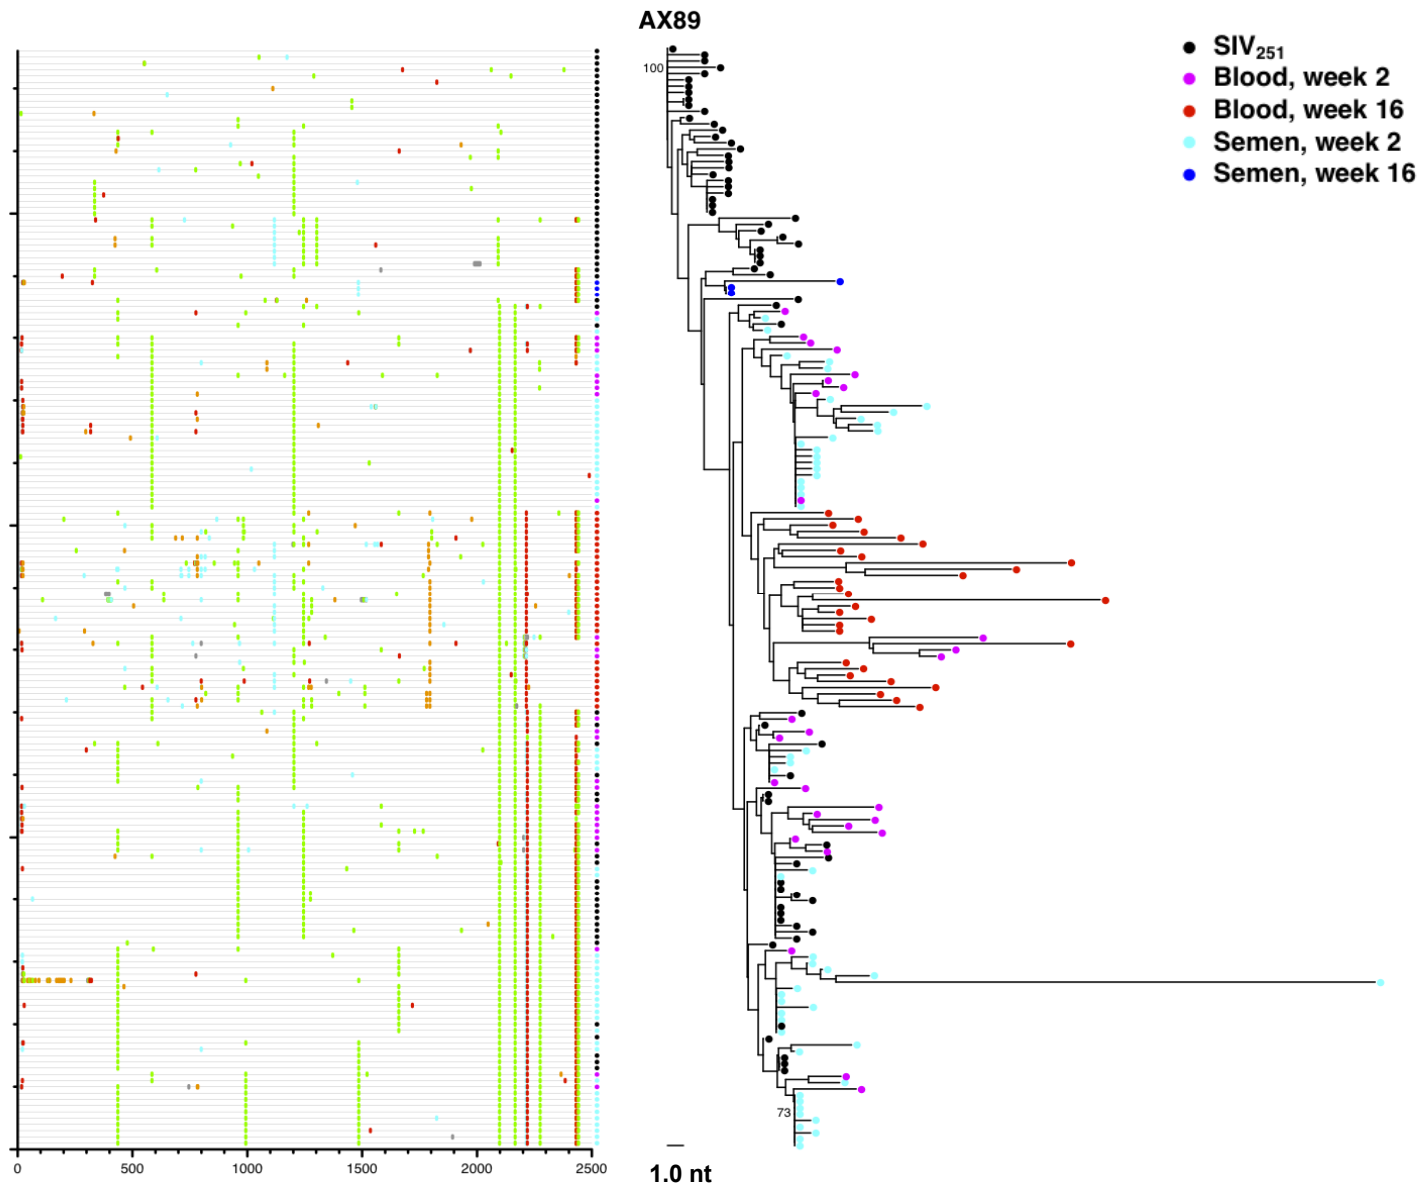

Figure S1

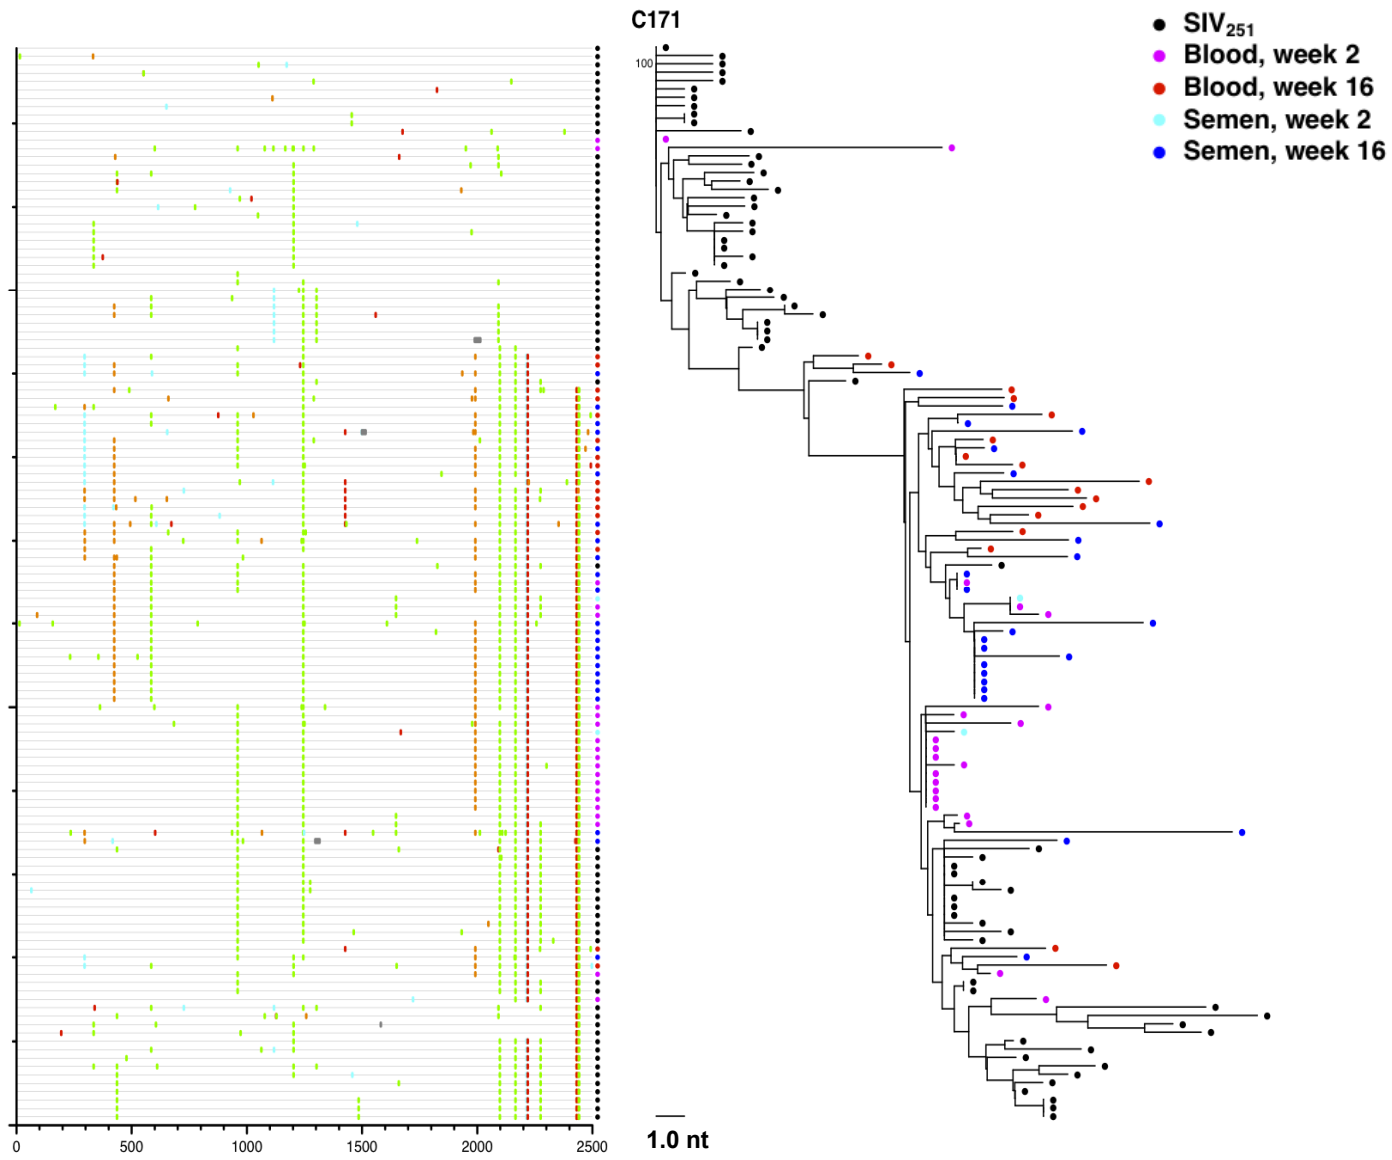

Figure S2

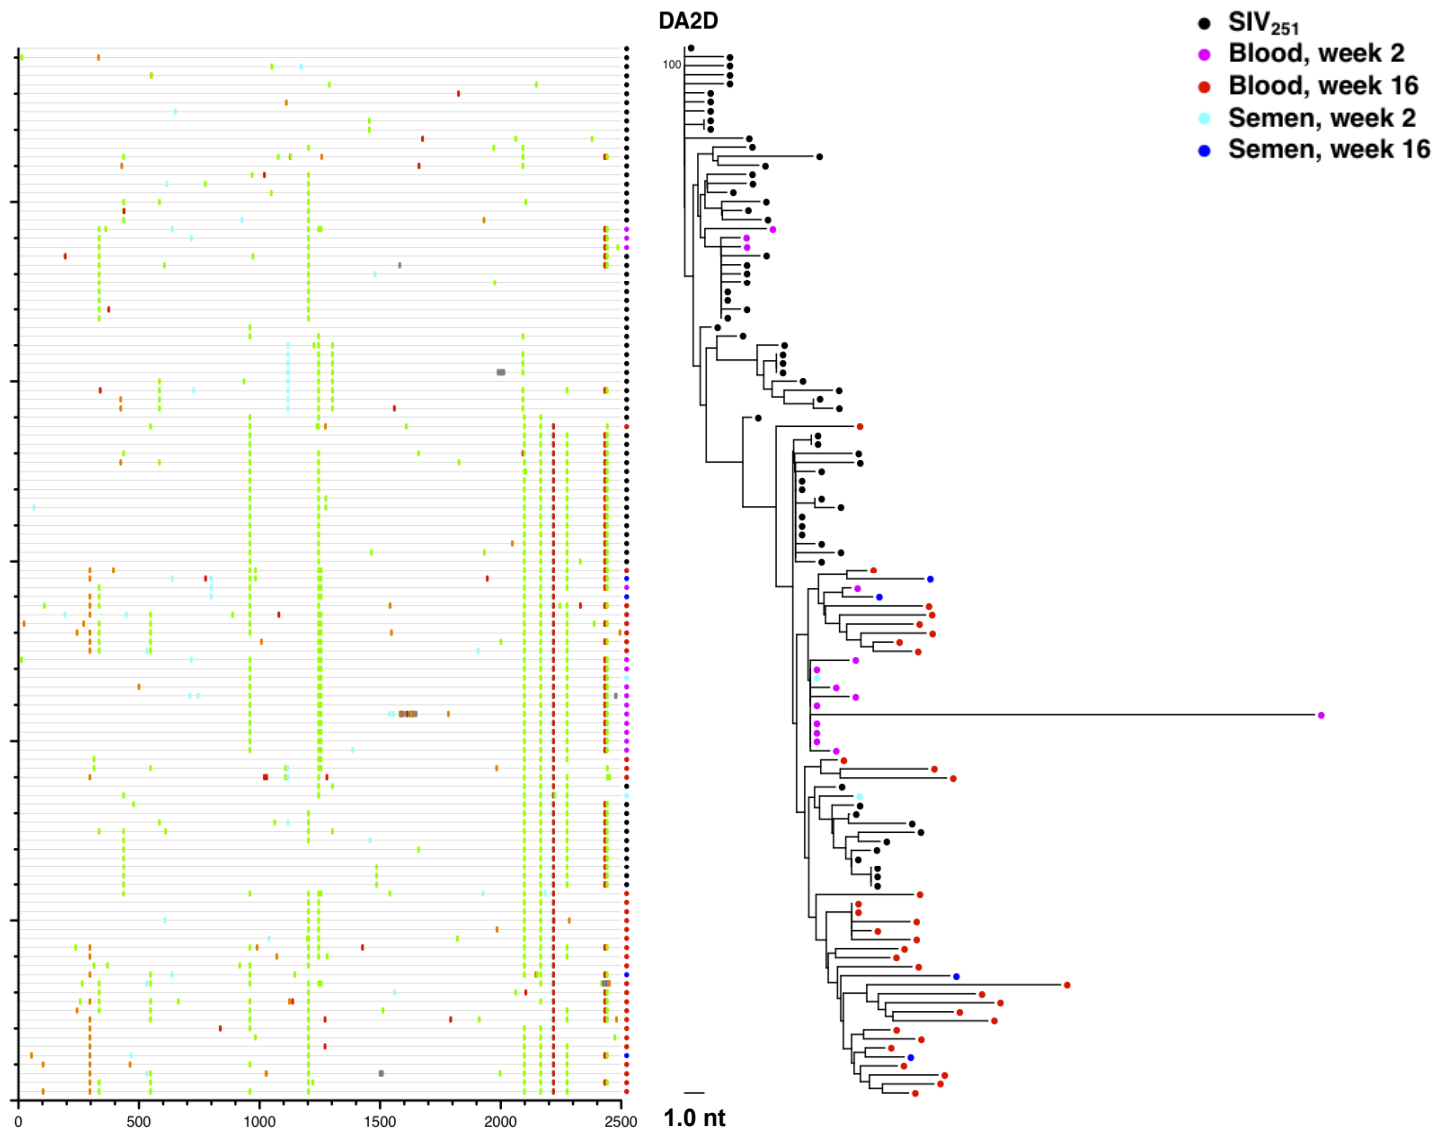

Figure S3

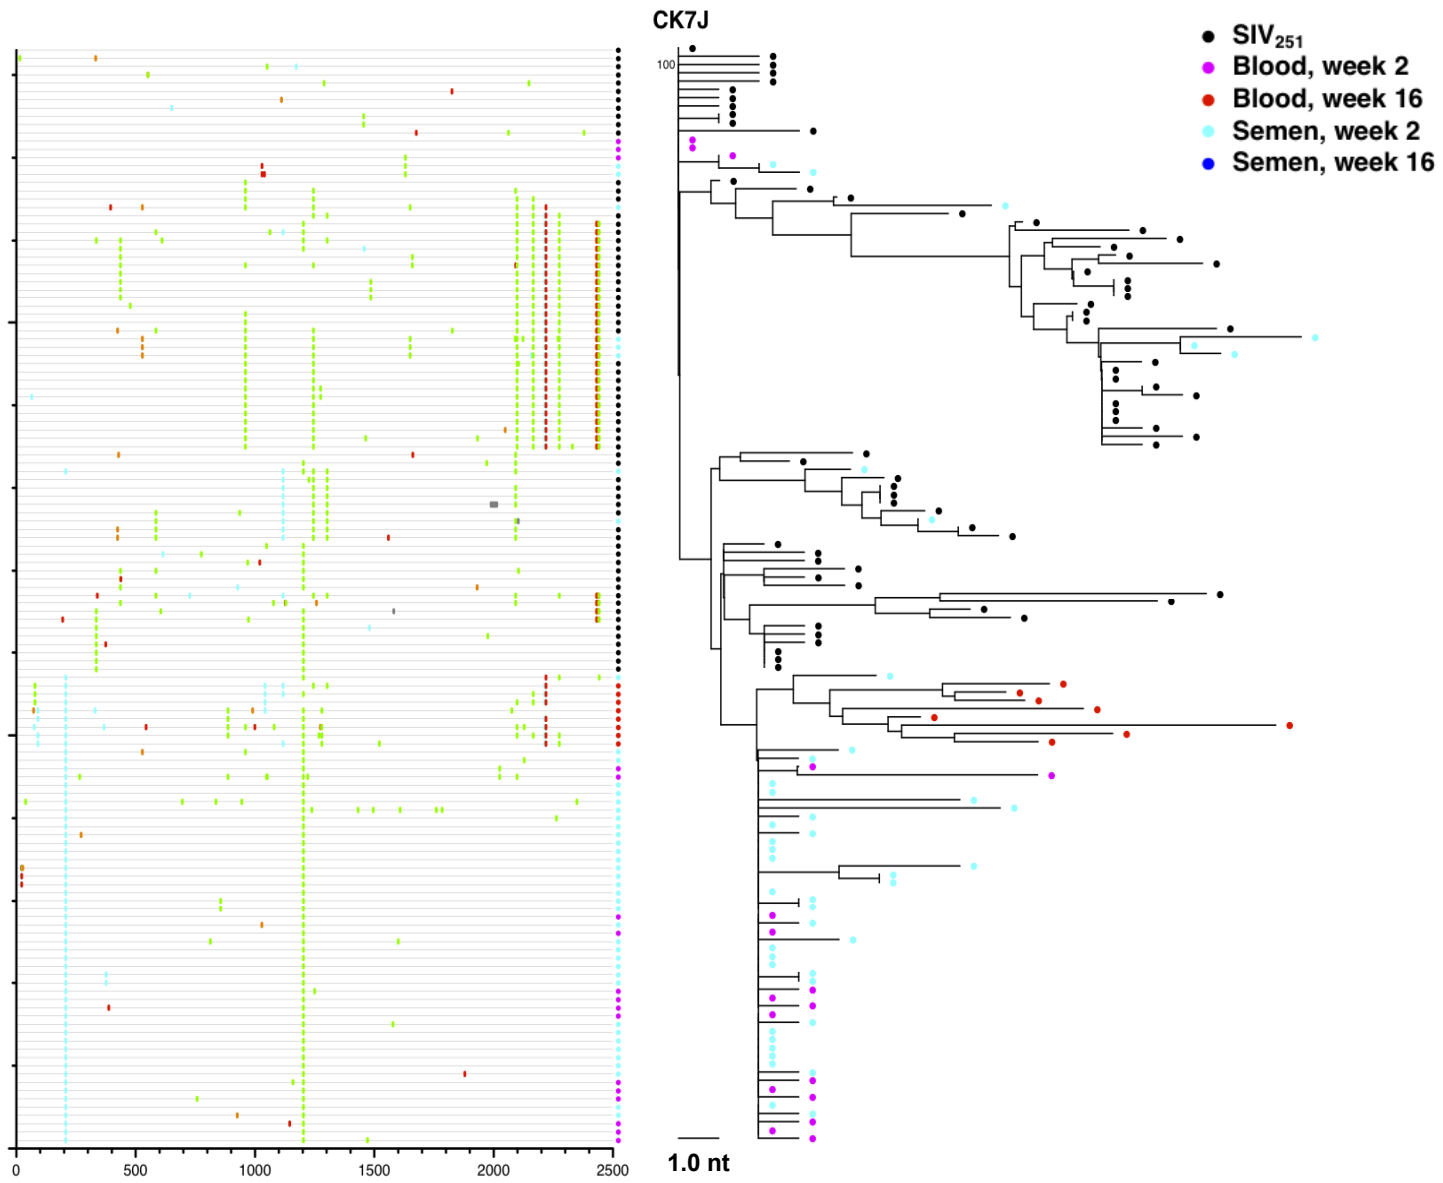

Figure S4

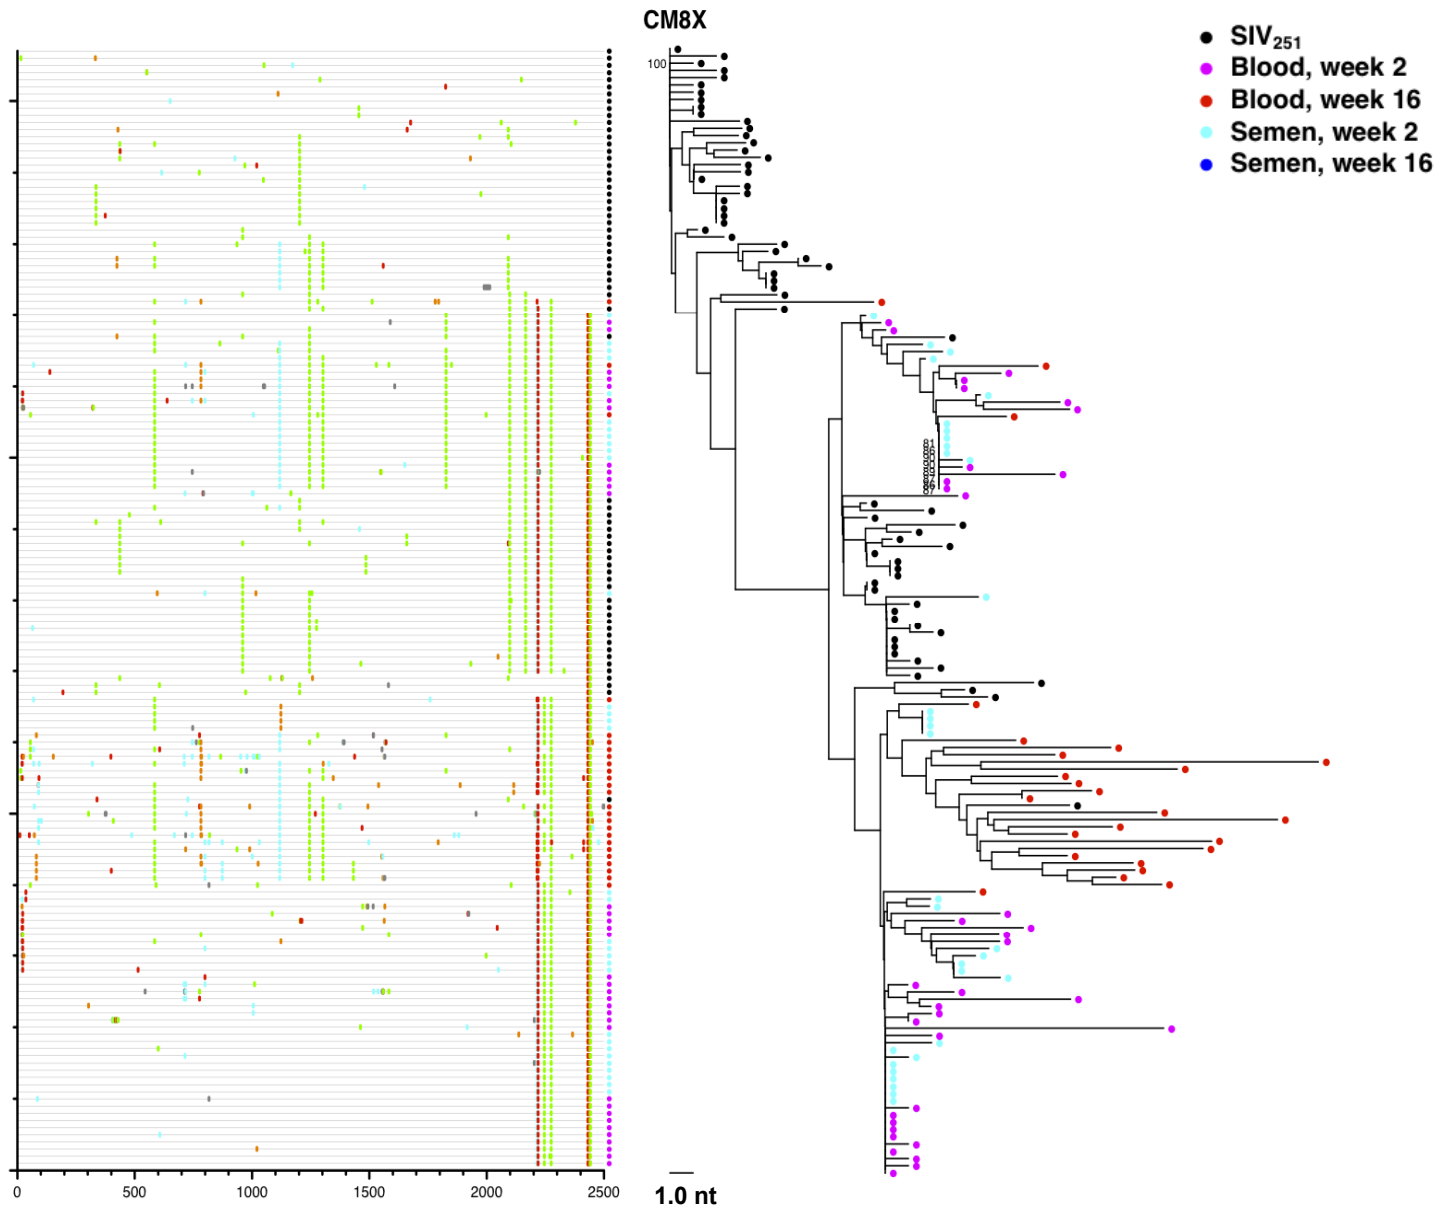

Figure S5

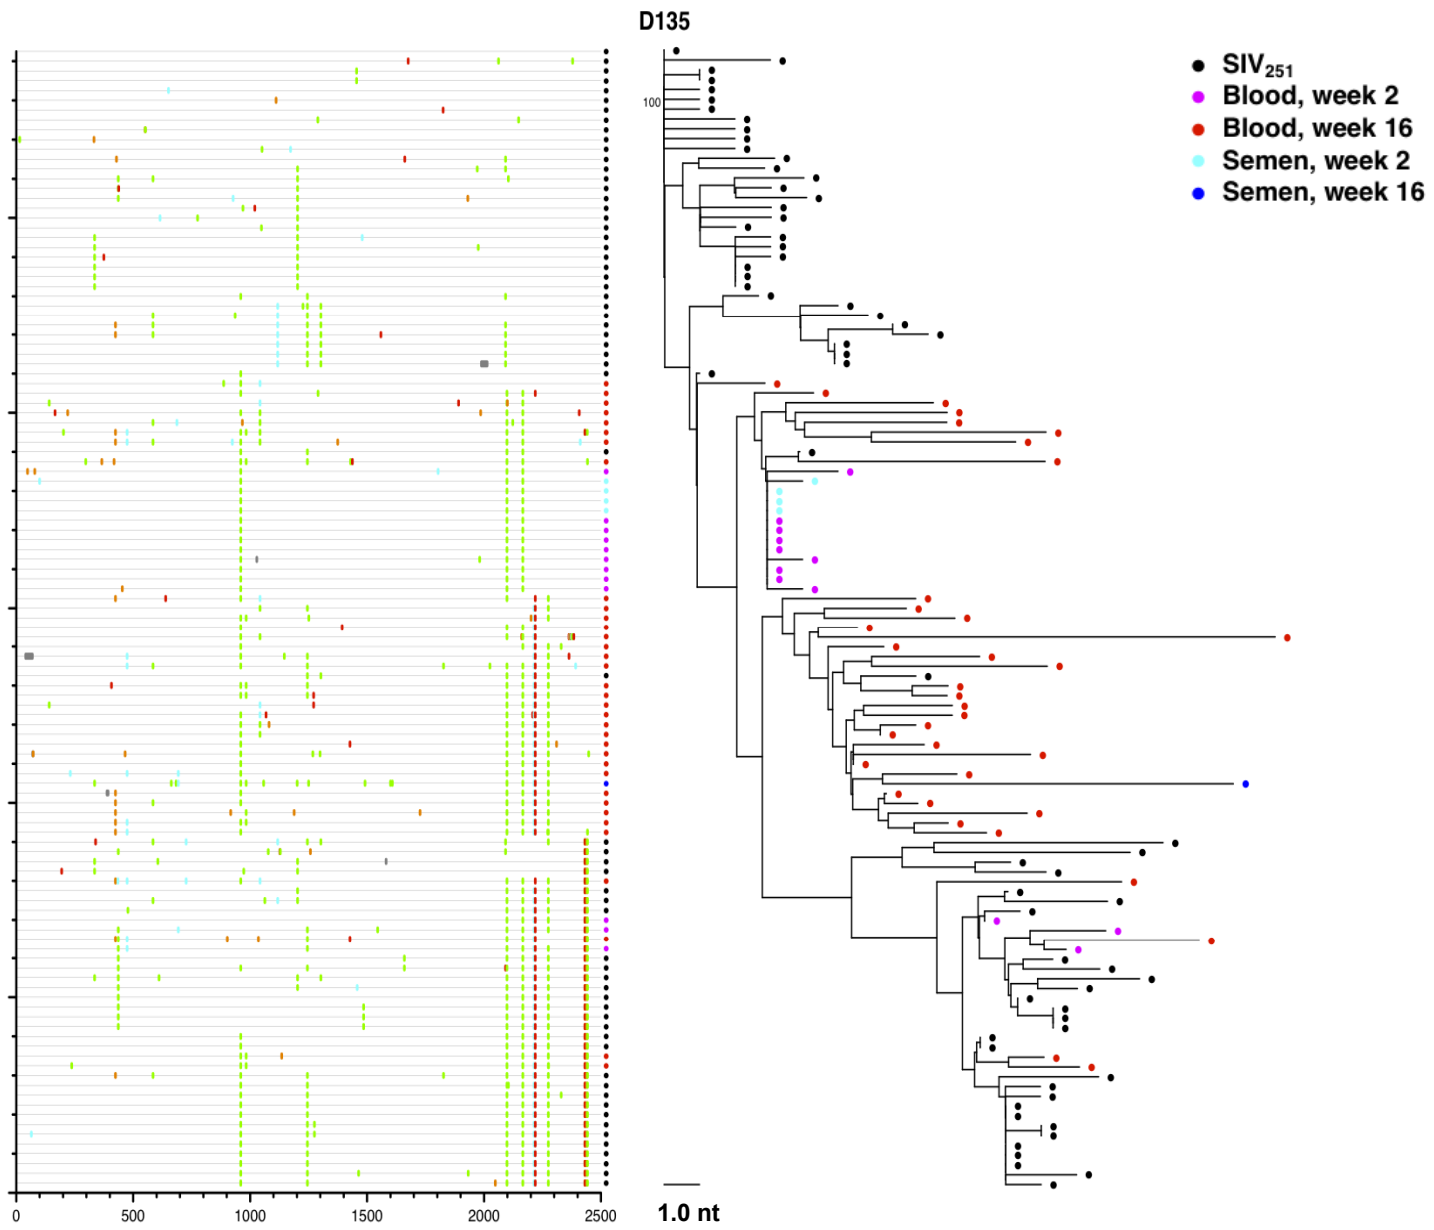

Figure S6

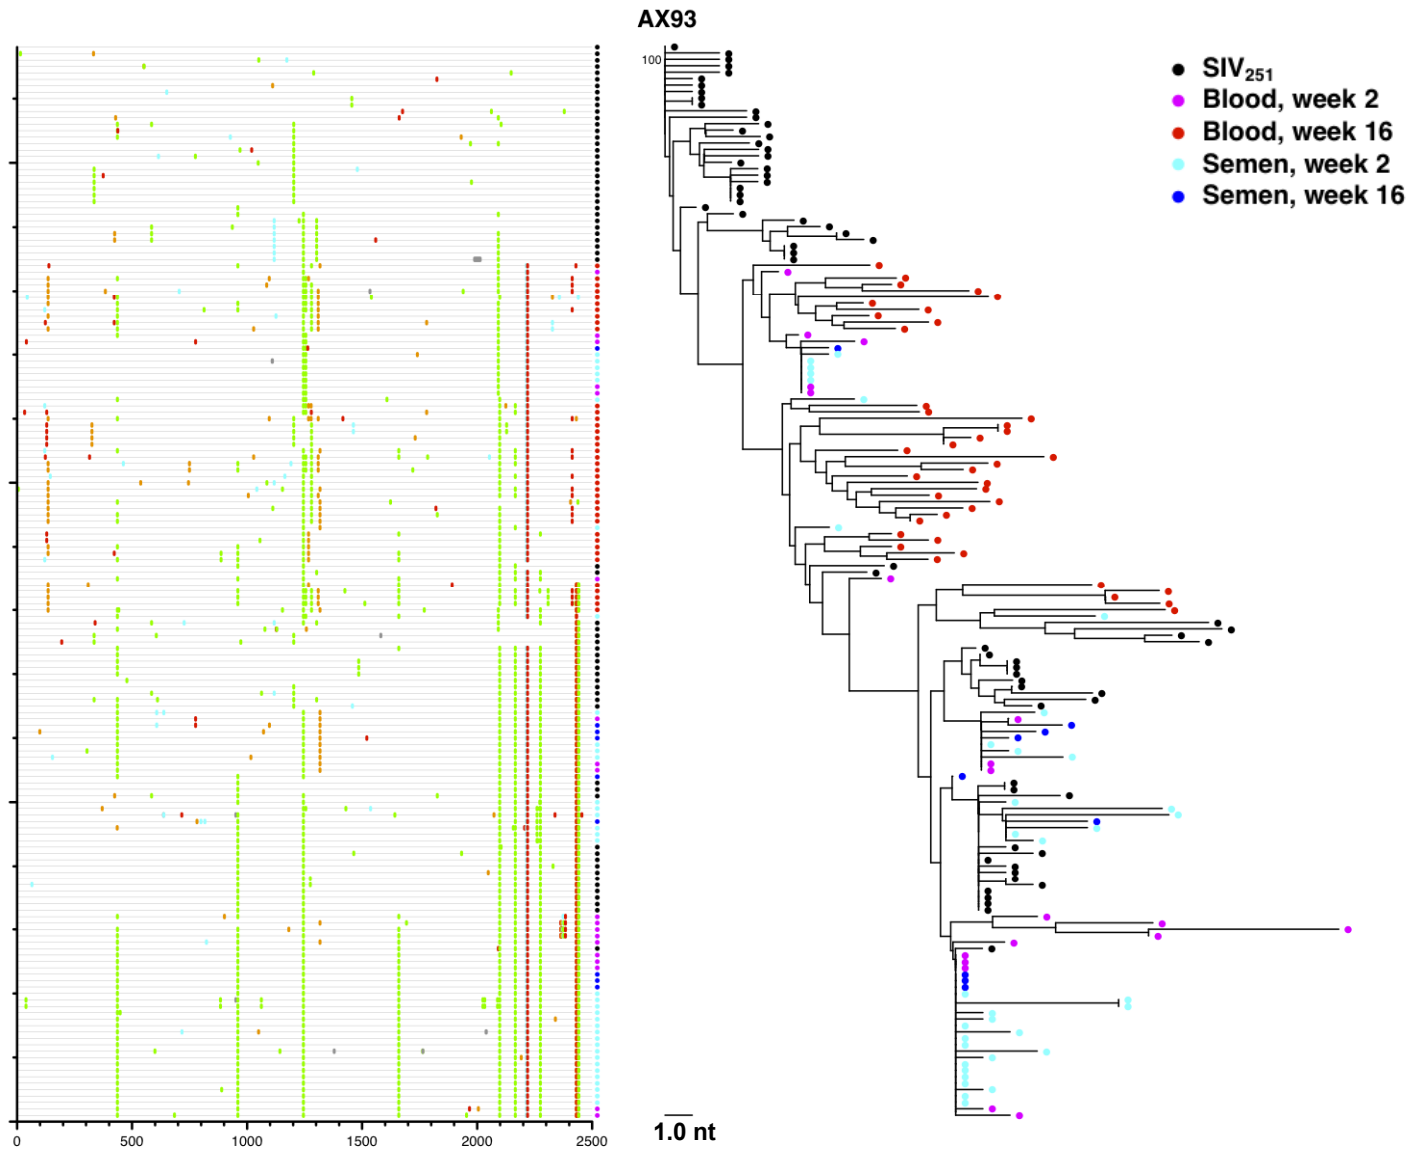

Figure S7

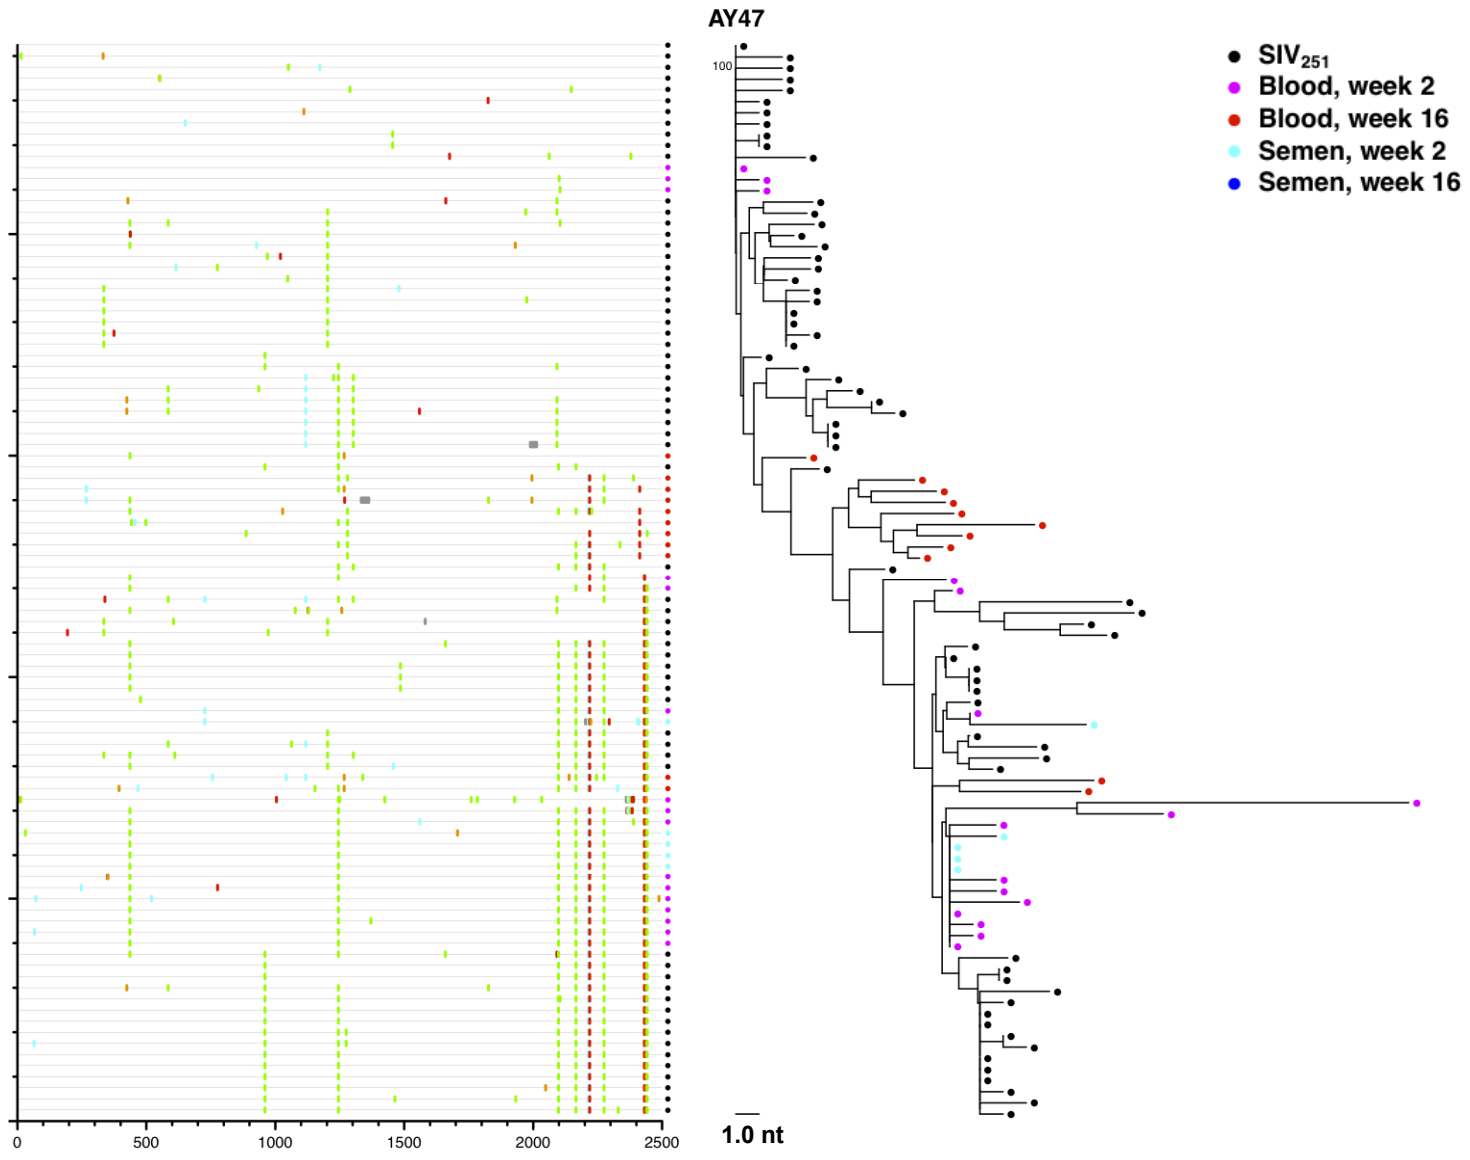

Figure S8



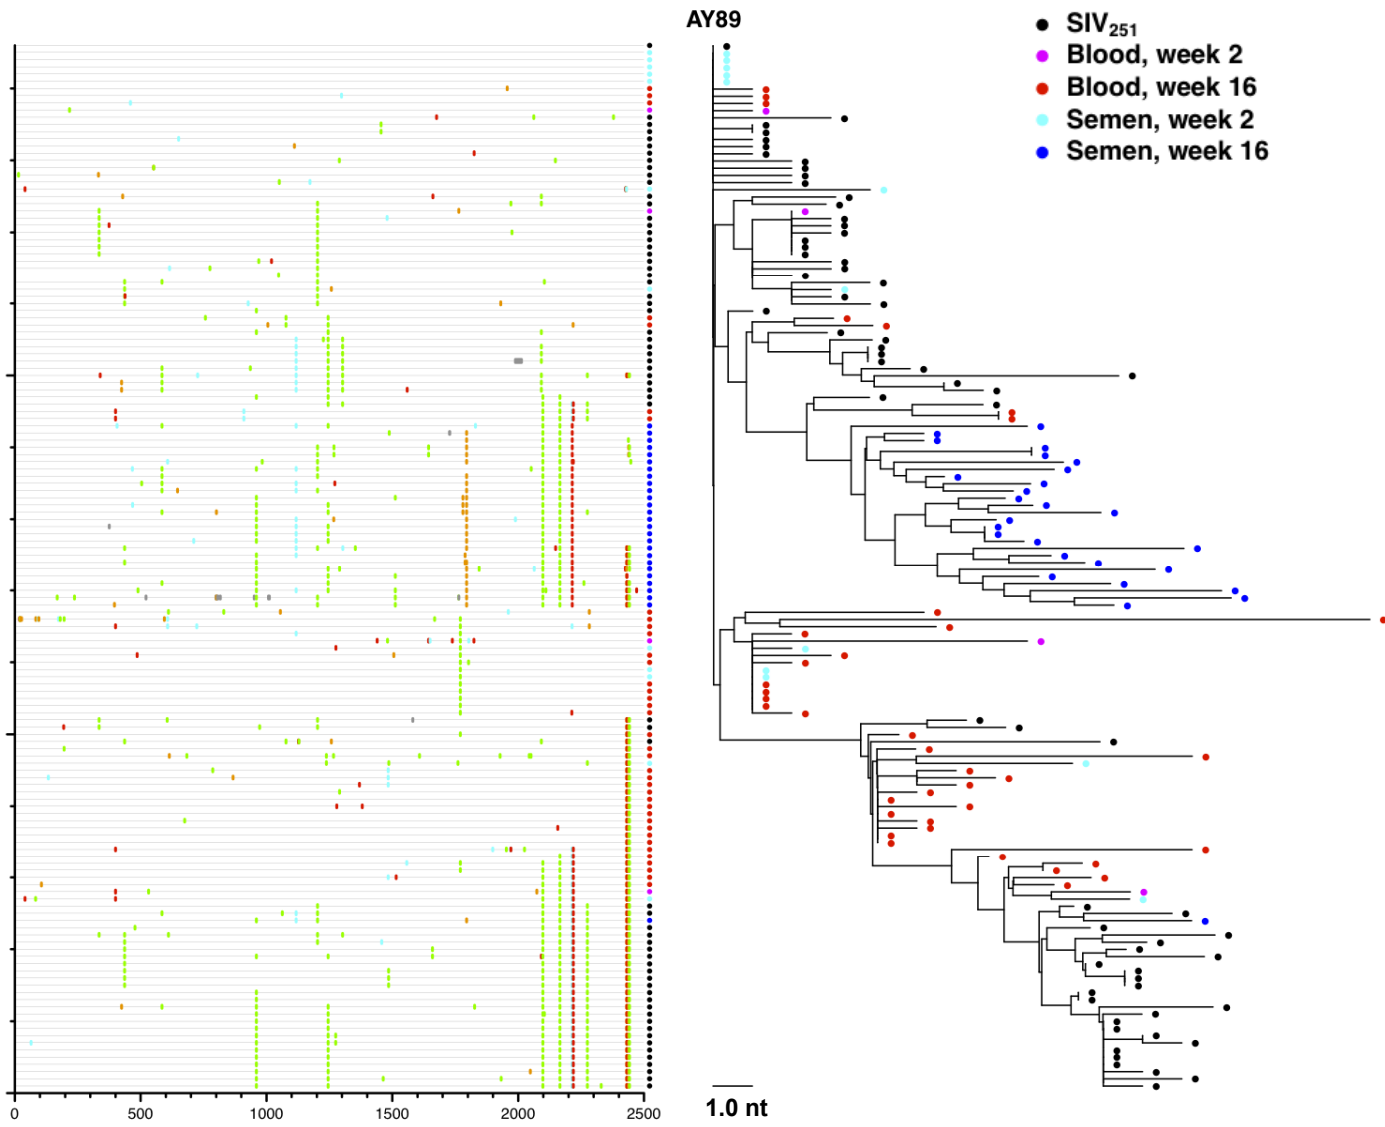

Figure S9

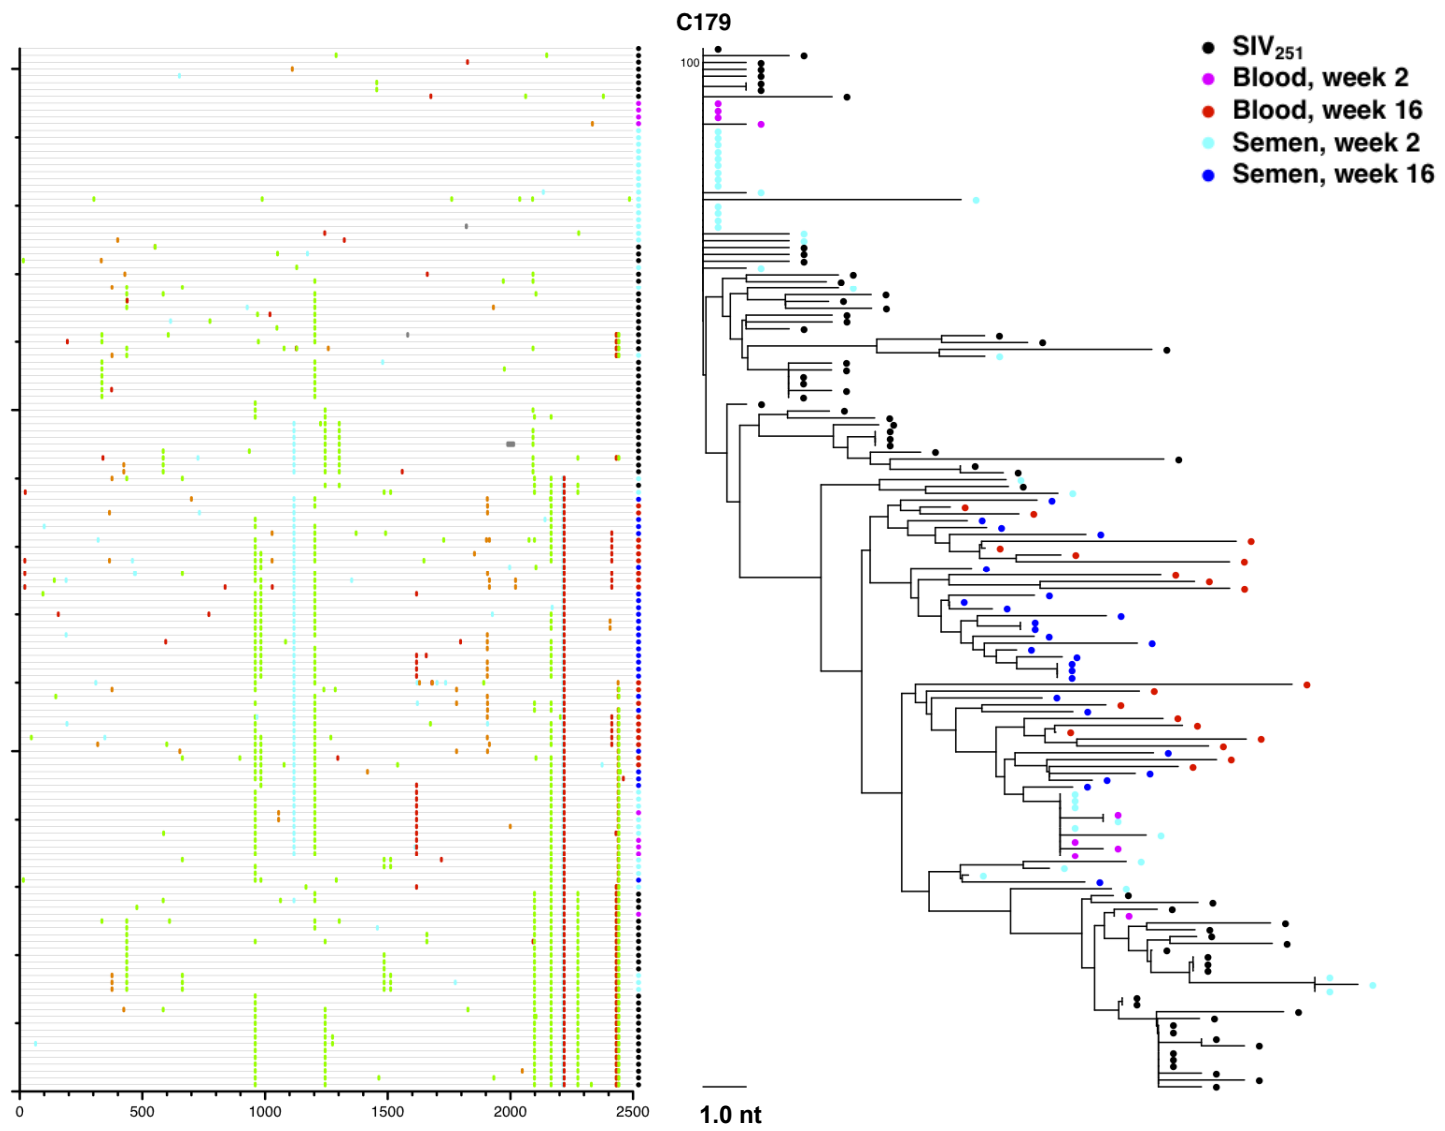

Figure S10
